# Supplementary material
Source: PubMed Central journal article supplement (PMC2882787)
Supplement: NIHMS102648-supplement-Supp_fig_legends.pdf [file NIHMS102648-supplement-Supp_fig_legends.pdf]

Supplement Figure 1A. Copy gain, loss, and LOH in Barrett's esophagus and esophageal adenocarcinoma. Panels A-D show significant lesions in: A) early stages of progression for chromosomes 1 to 11, B) early stages of progression for chromosomes 12 to 22, C) late stages of progression for chromosomes 1 to 11, D) late stages of progression for chromosomes 12 to 22. The x-axis is the chromosome position (Mb). Y-axis is the  $-\log_{10}$  of p-values for lesions that are statistically significant across patients with adjustment for multiple comparisons, shown as colored lines for copy gain (cyan), loss (green) and LOH (magenta). Vertical gray bars represent centromere positions. The numbers in parentheses indicate the number of 0.5 MB segments that are significant lesions in early stages only. The numbers in brackets are the segments found in both early stages and late stages.

Supplement Figure 1B. Significant lesions in early stages of progression for chromosomes 12 to 22.

Supplement Figure 1C. Significant lesions in late stages of progression for chromosomes 1 to 11.

Supplement Figure 1D. Significant lesions in late stages of progression for chromosomes 12 to 22.
